# Supplementary figures and images for: Early Cytokine-Induced Transient NOX2 Activity Is ER Stress-Dependent and Impacts β-Cell Function and Survival
Source: MDPI journal article supplement (doi:10.3390/antiox10081305), 2021-08-18

# Suppl. Figure S1

**A**

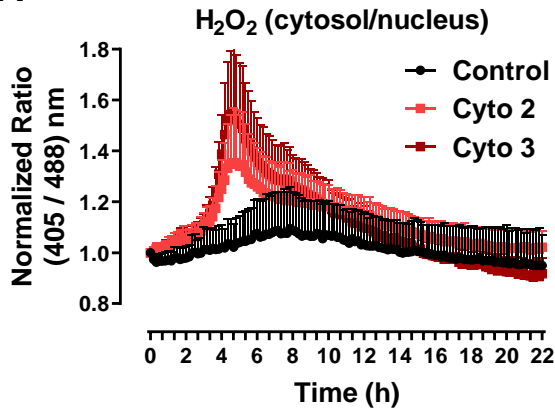

**B**

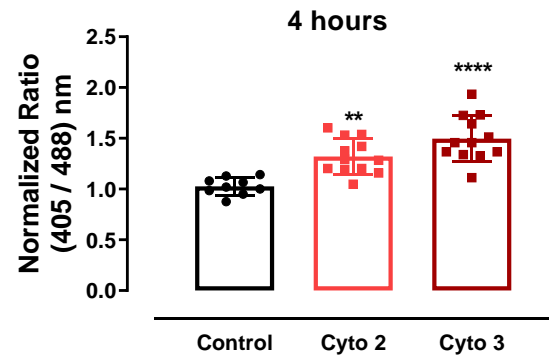

**C**

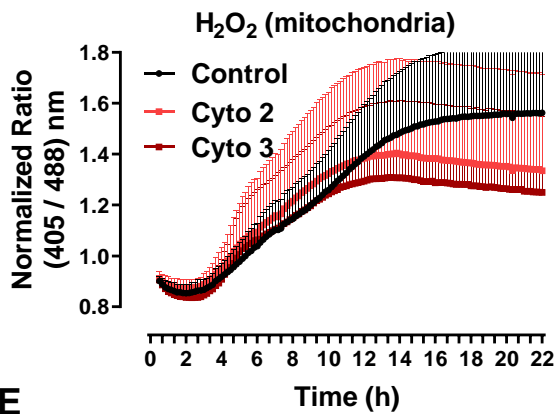

**D**

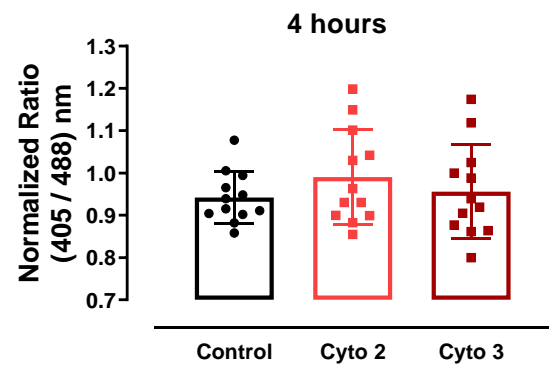

**E**

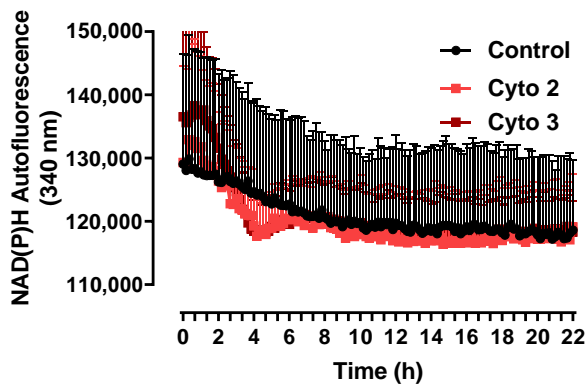

**F**

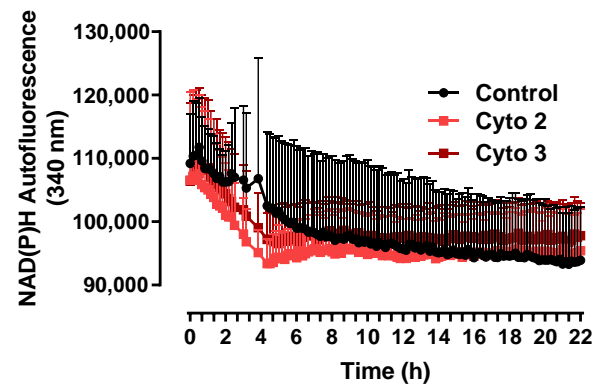

Supplement: s1 [file s1]
